# Supplementary material for: Gut microbiota and Sjögren’s syndrome: a two-sample Mendelian randomization study
Source: Front Immunol. 2023 Jun 13;14:1187906. doi: 10.3389/fimmu.2023.1187906 (PMC10299808; doi:10.3389/fimmu.2023.1187906)
Supplement: Supplementary file 2 [file Table_1.xlsx]

## Sheet: Table list
Table S1 MR analysis results of all five methods for significant taxa
Table S2 Included instrumental variables for significant taxa
Table S3 SNPs mapped genes using FUMA SNP2GENE tool
Table S4 MR analysis results of all five methods for significant genes
Table S5 Sensetivity analysis results for significant genes

## Sheet: Table S1
exposure	method	nsnp	b	se	pval
family.Porphyromonadaceae.id.943	MR Egger	9	-1.08202	0.955533	0.294771
	Weighted median	9	-0.652618	0.284189	0.0216518
	Inverse variance weighted	9	-0.429045	0.215601	0.0465914
	Simple mode	9	-0.731422	0.49926	0.181081
	Weighted mode	9	-0.731422	0.459376	0.150003
genus.Subdoligranulum.id.2070	MR Egger	11	-0.0984405	0.421586	0.820597
	Weighted median	11	-0.306156	0.225054	0.173713
	Inverse variance weighted	11	-0.377875	0.16389	0.0211295
	Simple mode	11	-0.276769	0.319231	0.406273
	Weighted mode	11	-0.211765	0.300279	0.496766
genus.Fusicatenibacter.id.11305	MR Egger	18	0.405597	0.532666	0.457467
	Weighted median	18	0.214637	0.202636	0.289496
	Inverse variance weighted	18	0.349024	0.142504	0.0143164
	Simple mode	18	0.185905	0.366302	0.618313
	Weighted mode	18	0.179009	0.390726	0.65265
genus.Ruminiclostridium9.id.11357	MR Egger	8	0.492423	1.23501	0.703902
	Weighted median	8	0.526994	0.296598	0.0756017
	Inverse variance weighted	8	0.516768	0.238926	0.0305508
	Simple mode	8	0.982845	0.521376	0.101404
	Weighted mode	8	0.951334	0.52531	0.11305
genus.Butyricicoccus.id.2055	MR Egger	8	-0.654347	0.361254	0.120055
	Weighted median	8	-0.492489	0.236983	0.0376947
	Inverse variance weighted	8	-0.39467	0.183983	0.0319417
	Simple mode	8	-0.5949	0.357523	0.14007
	Weighted mode	8	-0.558865	0.309479	0.113909
genus.LachnospiraceaeUCG008.id.11328	MR Egger	10	-0.872851	0.650118	0.216249
	Weighted median	10	-0.246317	0.159925	0.123511
	Inverse variance weighted	10	-0.288245	0.126736	0.0229432
	Simple mode	10	-0.316694	0.269155	0.269527
	Weighted mode	10	-0.342449	0.253557	0.209808
class.Methanobacteria.id.119	MR Egger	9	-0.0508734	0.416318	0.906176
	Weighted median	9	0.157237	0.133908	0.240309
	Inverse variance weighted	9	0.199905	0.101328	0.0485128
	Simple mode	9	0.283358	0.193554	0.181356
	Weighted mode	9	0.206617	0.190532	0.309774
family.Methanobacteriaceae.id.121	MR Egger	9	-0.0508734	0.416318	0.906176
	Weighted median	9	0.157237	0.128451	0.220914
	Inverse variance weighted	9	0.199905	0.101328	0.0485128
	Simple mode	9	0.283358	0.203423	0.201123
	Weighted mode	9	0.206617	0.186635	0.30044
order.Methanobacteriales.id.120	MR Egger	9	-0.0508734	0.416318	0.906176
	Weighted median	9	0.157237	0.139176	0.258573
	Inverse variance weighted	9	0.199905	0.101328	0.0485128
	Simple mode	9	0.283358	0.207211	0.208655
	Weighted mode	9	0.206617	0.187645	0.302874

## Sheet: Table S2
exposure	SNP	effect_allele	other_allele	beta.exposure	beta.outcome	se.exposure	se.outcome	pval	Fval
genus.Subdoligranulum	rs10065321	T	C	-0.0512828	0.0186242	0.0108105	0.0304849	2.10155e-06	22.5035
	rs10497836	C	T	-0.0524065	0.0368924	0.0118697	0.0367932	8.37954e-06	19.4934
	rs1667315	G	A	0.0485017	-0.0711176	0.0107452	0.0308489	6.72143e-06	20.3744
	rs2114677	C	T	-0.104176	0.0546595	0.0230829	0.047038	2.71726e-06	20.3685
	rs2171249	C	T	0.106744	-0.0273581	0.0233213	0.0576938	4.50556e-06	20.9498
	rs35940633	G	A	-0.0511008	-0.00345989	0.011001	0.0320936	4.21698e-06	21.5769
	rs3761728	T	G	-0.0543458	0.00294303	0.0118866	0.0347752	3.86747e-06	20.9033
	rs4347804	A	G	0.166063	-0.0926756	0.0357483	0.0848157	2.18405e-06	21.5792
	rs6555306	T	C	-0.0740777	0.0543886	0.0155463	0.043161	2.80664e-06	22.705
	rs75158211	T	C	-0.072343	0.010439	0.015933	0.0424943	7.52162e-06	20.6156
	rs76528319	G	T	-0.143279	-0.00298362	0.0310662	0.0544806	7.41394e-06	21.2709
genus.Butyricicoccus	rs10084203	A	G	0.0549699	-0.036607	0.0123563	0.0449014	8.58646e-06	19.7913
	rs12034718	A	G	0.0701199	-0.0294013	0.0158213	0.0362248	9.57686e-06	19.6424
	rs12585793	T	C	-0.262206	0.159393	0.0564729	0.0910696	5.79191e-06	21.5579
	rs2017189	G	T	-0.0506956	-0.000287978	0.011024	0.0301337	3.87256e-06	21.1476
	rs4962426	G	T	0.0614216	0.0265348	0.0135979	0.0380852	7.3849e-06	20.4032
	rs56221232	T	C	0.0828027	-0.061022	0.0167401	0.050202	7.6194e-07	24.4667
	rs62478070	T	G	0.224039	-0.0748007	0.0494959	0.0960046	5.9377e-06	20.4885
	rs7322368	T	C	0.0815733	-0.0463045	0.0183167	0.0525533	5.5178e-06	19.8337
family.Porphyromonadaceae	rs10762312	G	A	-0.052368	0.000311117	0.0118814	0.0325804	8.70354e-06	19.4265
	rs10858364	G	T	0.055316	-0.0354909	0.012085	0.0354439	4.31063e-06	20.9512
	rs17065783	A	G	-0.059133	0.0399856	0.0122235	0.04124	1.79351e-06	23.4028
	rs1980561	A	G	-0.0485289	-0.013156	0.0109284	0.0301774	8.94542e-06	19.7192
	rs35233670	T	C	-0.0473576	0.0339514	0.010602	0.0301638	7.90987e-06	19.9529
	rs35961441	A	C	0.0915257	-0.12736	0.0207306	0.0779101	8.37393e-06	19.4923
	rs6953849	A	G	0.0718149	0.0115173	0.0150724	0.0393334	2.4448e-06	22.7019
	rs7330827	T	C	-0.103842	0.0810831	0.0237355	0.0638591	8.04891e-06	19.1403
	rs864093	A	C	-0.0527939	0.04541	0.0117499	0.0370644	9.598e-06	20.1882
genus.Fusicatenibacter	rs10439674	A	G	-0.0572129	-0.0224124	0.0130007	0.0374136	7.68485e-06	19.3667
	rs167879	C	T	-0.0659543	-0.0644289	0.0148763	0.0424951	5.86893e-06	19.6562
	rs1864685	A	C	-0.0494799	-0.0695843	0.0108105	0.0307322	4.96161e-06	20.9492
	rs2025938	G	A	-0.0967298	-0.0338756	0.0205426	0.060796	2.98832e-06	22.1723
	rs206581	A	G	-0.0568339	-0.0283904	0.0127894	0.0365894	8.95756e-06	19.7476
	rs2132128	G	A	-0.0771914	-0.0138336	0.0160344	0.0502502	1.07686e-06	23.1755
	rs3303	T	C	-0.0953657	0.0258069	0.020407	0.0618284	3.93891e-06	21.8387
	rs4378146	A	C	-0.0616691	-0.00566455	0.0125259	0.0346186	7.20451e-07	24.2392
	rs60254196	A	G	-0.0492427	0.000927	0.0109365	0.0302808	5.46739e-06	20.2735
	rs62187631	T	C	-0.0710571	-0.048445	0.015924	0.0382307	4.54526e-06	19.9118
	rs62353480	A	G	-0.0701397	0.00811916	0.0145589	0.040307	1.56768e-06	23.2098
	rs6515626	G	A	0.141575	0.100889	0.0313559	0.0603128	7.28654e-06	20.3862
	rs704418	T	C	0.0739124	-0.0247697	0.0151073	0.0456567	7.77428e-07	23.9366
	rs73103914	A	G	-0.0597324	-0.0096815	0.0134458	0.0424016	8.29563e-06	19.7355
	rs792108	T	C	-0.0508345	0.0328987	0.0113843	0.0306549	8.49535e-06	19.939
	rs8028026	A	G	-0.0792146	-0.0185339	0.0180505	0.0522792	8.0633e-06	19.259
	rs8063430	T	C	-0.104026	-0.0149537	0.022217	0.0688292	4.9289e-06	21.9239
	rs9905659	G	A	-0.061617	-0.0921038	0.0136576	0.0391676	7.30993e-06	20.3542
genus.LachnospiraceaeUCG008	rs10741777	T	C	-0.0973842	0.0509751	0.0194791	0.032602	7.68659e-07	24.9941
	rs10793103	C	T	0.0974344	-0.0464944	0.0181279	0.0302873	9.34937e-08	28.8887
	rs10801803	G	A	-0.117029	0.0255168	0.0243085	0.0430139	1.40029e-06	23.1778
	rs13024781	T	C	-0.0798769	0.0208122	0.0168846	0.030197	2.29166e-06	22.3801
	rs57091572	A	G	-0.110443	-0.0235315	0.0235801	0.0444884	2.85822e-06	21.9372
	rs61944774	A	G	0.179838	-0.0895319	0.0393797	0.0677699	6.34122e-06	20.8554
	rs62277846	C	T	0.102292	0.019595	0.0212319	0.0382872	1.58892e-06	23.2118
	rs67078837	T	C	-0.0845848	0.0105792	0.0170693	0.0305719	7.68189e-07	24.5559
	rs75356640	G	A	0.136523	-0.143052	0.0303128	0.0473971	9.83206e-06	20.2844
	rs955844	A	C	0.112064	0.0239311	0.0228369	0.0433387	1.80994e-06	24.0801
genus.Ruminiclostridium9	rs12040548	G	T	0.0570422	0.0612439	0.0122359	0.0338288	3.14872e-06	21.733
	rs6082461	A	C	0.0586425	0.0660054	0.0131004	0.0373779	4.86594e-06	20.0381
	rs7137760	C	T	0.050797	-0.0286968	0.0112182	0.030247	7.06911e-06	20.5035
	rs74303178	T	C	0.0532742	0.0474625	0.0119274	0.0323721	7.91566e-06	19.9501
	rs78191726	T	C	0.0944998	0.0319617	0.0210206	0.0581244	7.58287e-06	20.2103
	rs918449	A	G	-0.0950908	-0.0452617	0.0197177	0.0584208	2.55994e-06	23.2576
	rs9522712	T	C	0.0699728	0.0883289	0.0154939	0.0426858	4.65962e-06	20.3956
	rs9809789	C	T	-0.0717454	0.0154904	0.0159673	0.0390927	8.71968e-06	20.1894

## Sheet: Table S3
genus.Butyricicoccus	genus.Subdoligranulum	genus.Ruminiclostridium9	family.Porphyromonadaceae	genus.LachnospiraceaeUCG008	genus.Fusicatenibacter
PMS1	TXK	STYK1	MIPEP	ATP2C2	STPG1
DOCK9	TNS1	SIRPB1	FCN1	BCKDHB	NIPAL3
BCCIP	RGS17	MAGOHB	C3orf14	CRISPLD2	TCEB3
STAM2	URI1	PRR4	MRPS2	TTK	RUNX3
WDR75	SLAIN2	TGM3	KCNH5	SPCS2	MSR1
STAT1	OCIAD1	STK35	PTPRG	ELOVL4	SPO11
GLS	CWH43	SIRPD	PRKCA	ZNF644	CUL1
SLC35D1	MTRF1L	KLRD1	CEP112	KLHL36	CST7
SGIP1	NCL	KLRC1	HKDC1	KIAA0513	CASS4
RASL11A	SATB2	GABARAPL1	AUTS2	ANK2	PYGB
CLYBL	ARAP3	KLRF1	AXIN2	TIFA	ABHD12
TM9SF2	CPXM2	CLEC1A	C10orf35	KLHL35	GINS1
RNF6	NDFIP1	KCTD15	PRF1	RPS3	NINL
ORMDL1	TEC	NLRP3	GREM2	ZDHHC7	BMP7
ATP8A2	TMBIM1	ZNF496	RGS7	PGM2L1	RAE1
CDK8	OCIAD2	TRIM58	PPP1R26	XRRA1	APMAP
STAT4	C2orf47	GCSAML	COL13A1	RNF169	PSMD7
ASNSD1	NMUR1	CLEC12A	U3	NAV2	TUSC3
NAB1	PSMD1	EIF2S3L	PLEKHM1P	MFF	XPNPEP1
ANKAR	CHST15	KLRC4	AC025426.1	COL4A3	SMC3
INPP1	SPATS2L	SGCZ	AL157931.1	KLF13	HMGCL
MFSD6	PTMAP2	ZNF124	PRKRIRP8	AGFG1	RCAN3
TCTEX1D1	SNORA75	CLEC9A	RP11-80B9.1	LARP7	MXI1
WDR78	AC009987.1	SNORD38	RP5-942I16.1	PAAF1	TSFM
PTPRN2	AC118282.1	KLRC2	CTB-191D16.1	MRPL48	ARHGAP9
TRMT44	AC118282.2	KLRC3	RP11-927P21.1	RAB6A	METTL21B
FMNL2	AC118282.3	TAS2R14		ZDHHC13	GCNT7
IL23R	FTCDNL1	SIRPB3P		RP11-11L12.2	PMEPA1
GPR183	AC098823.3	AC091814.2		AC004057.1	ZNF337
HTRA3	CXCR2P1	GCSAML-AS1		LRRC8B	RBM38
AC093323.3	AC005592.2	RP4-673D20.3		SH3BGRL2	FAM104A
KIAA0232	DIRC3	RPL7L1P1		STK39	SLC39A11
CTBP2	AC009492.1	OR2W3		RP11-486E2.1	SRRM1
SHISA2	RP11-1281K21.1	RP11-277P12.20		GAPDHP63	NAPG
SORCS2	RP11-1281K21.7	KLRC4-KLRK1		RP11-250B2.2	AVIL
C2orf88	RP11-445O3.2	RP11-291B21.2		RN7SKP297	TSPAN31
TMEM194B	RP11-1281K21.3	RP11-277P12.9		RP11-250B2.3	OS9
AFAP1	RP11-1281K21.2	RP11-705C15.2		AC097662.2	DOCK10
HIBCH	SNX18P23	CLEC12B		RP11-147I3.1	DUSP5
MIER1	CTD-2281M20.1	KLRAP1		RP11-402J6.3	MARCH9
LINC00449	RP11-486F17.1	SLC25A39P2		AP001372.2	INHBE
RNY3P6	AC118282.4	RP11-705C15.3		NLRP9P	C17orf80
UBAC2-AS1	AC005307.3	LSM14A		UBE2CP4	NYAP2
AC011899.9	RP11-1281K21.6	RP11-488L18.10		HERC2P10	CACUL1
AC093388.3		CTC-523E23.1		RP11-250B2.5	BAG3
CCR12P				RP11-254F19.2	ACSS1
RN7SKP179				MIR4486	PDIA4
DOCK9-AS2					MX1
AL583784.1					LDLRAP1
MIR4274					PRICKLE2
RP11-647K16.1					FAM204A
					COG1
					XRCC6BP1
					MBD6
					RFWD3
					CLIC4
					NANP
					ZNF212
					ZNF282
					FAM182B
					CTDSP2
					FUCA1
					AEN
					ZNF467
					BACE2
					MX2
					SFXN4
					FAM3B
					NCMAP
					STAC3
					RHD
					NANOS1
					ZNF398
					ZNF786
					ENTPD6
					U3
					ZNF783
					ZNF425
					ZNF337-AS1
					RP4-800J21.3
					AC080037.1
					RP4-813D12.3
					RP13-401N8.1
					LINC00511
					MIR663A
					RP11-496D1.2
					PPIAP2
					AC016717.1
					AP001610.5
					MTND1P9
					RP11-84D1.1
					VN1R108P
					RP3-481F12.1
					MED28P7
					RP3-469D22.1
					Y_RNA (ensemble ID ENSG00000252064)
					RPL21P103
					RN7SL594P
					RP4-800G7.2
					UBL5P1
					RNU6ATAC17P
					Y_RNA(ensemble ID ENSG00000239106)
					SCARNA24
					MTRNR2L3
					RP11-620J15.3
					RP11-138E9.2
					RP11-883A18.3
					RP11-243E13.2
					MIR4325
					RP11-525A16.4
					RP11-314B1.2

## Sheet: Table S4
exposure	method	nsnp	b	se	pval
ARAP3	MR Egger	71	0.194348	0.0628019	0.00284583
	Weighted median	71	0.14127	0.0510072	0.00561246
	Inverse variance weighted	71	0.121275	0.0346514	0.000465481
	Simple mode	71	0.166098	0.0826272	0.0482643
	Weighted mode	71	0.154932	0.0528321	0.00454043
NMUR1	MR Egger	17	-0.398869	0.198135	0.0624086
	Weighted median	17	-0.298384	0.139075	0.0319141
	Inverse variance weighted	17	-0.344376	0.100856	0.000638905
	Simple mode	17	-0.141458	0.209864	0.509905
	Weighted mode	17	-0.295779	0.15003	0.0662184
SIRPD	MR Egger	27	-0.169565	0.133143	0.214534
	Weighted median	27	-0.242643	0.101575	0.0169031
	Inverse variance weighted	27	-0.248323	0.0695102	0.000353632
	Simple mode	27	-0.186252	0.173559	0.293071
	Weighted mode	27	-0.208848	0.110549	0.0700681
TEC	MR Egger	11	1.01411	0.474408	0.0612573
	Weighted median	11	0.551976	0.231003	0.0168725
	Inverse variance weighted	11	0.775004	0.166251	3.13679e-06
	Simple mode	11	1.38261	0.377099	0.00434249
	Weighted mode	11	0.377351	0.29435	0.228772

## Sheet: Table S5
Taxa	Heterogeneity						Pleiotropy
	MR Egger			IVW			MR Egger
	Cochran's Q	P-value		Cochran's Q	P-value		Egger intercept	P-value
NMUR1	11.5184	0.715056		11.6205	0.769666		0.00637673	0.753739
TEC	7.72344	0.562239		8.01302	0.627565		-0.0232954	0.603541
ARAP3	61.6121	0.724263		63.5584	0.693306		-0.0154124	0.167453
SIRPD	20.8235	0.702411		21.3045	0.726082		-0.010489	0.494361
